# Supplementary material
Source: bioRxiv or medRxiv preprint supplement (https://www.biorxiv.org/highwire/filestream/140878/field_highwire_adjunct_files/4/470393-5.pdf)
Supplement: Supplementary file [file 470393-5.pdf]

**Table 5 – List of primers and oligos**

**Legend**

|         |                                                                                                                                                                 |
|---------|-----------------------------------------------------------------------------------------------------------------------------------------------------------------|
| Fw      | Forward primer                                                                                                                                                  |
| Rv      | Reverse primer                                                                                                                                                  |
| Ta      | Annealing temperature used in the PCR reaction                                                                                                                  |
| WT      | Wild type (amplification of the wt 3'UTR of interest)                                                                                                           |
| MUT frg | Mutated fragments (primers used to amplify fragments of 3'UTR mutating the miR-181a-5p responsive elements), fragments were then joint by OE-PCR before cloning |
| MUT Q5  | Primers used to mutate plasmid with Q5 mutagenesis kit (NEB)                                                                                                    |
| MO      | Morpholino                                                                                                                                                      |

| Oligo Name            | Ta | Sequence (5'→3')                                         | Used for                 |
|-----------------------|----|----------------------------------------------------------|--------------------------|
| Dicer_HA_Fw           | 60 | AAGAAACACTGGATGATTGAAAAGC                                | mice genotyping          |
| Dicer_HA_Rv           | 60 | AAGAAAGGACCCATTGGTGAGG                                   | mice genotyping          |
| MAP2_Fw               | 60 | CACGTACTCCTGGAACACCC                                     | axonal purity test       |
| MAP2_Rv               | 60 | TGGAACCACAACGAGACTGA                                     | axonal purity test       |
| H4_Fw                 | 60 | GGCAAAGGAGGAAAAGGACT                                     | axonal purity test       |
| H4_Rv                 | 60 | GAGAGCGTACCCACATCCA                                      | axonal purity test       |
| ACTB_Fw               | 60 | CGTAAGGACCTCTATGCCAA                                     | axonal purity test       |
| ACTB_Rv               | 60 | TGCATTGATGACCATACAGTG                                    | axonal purity test       |
| U6_Fw                 | 60 | CTCGCTTCGGCAGCACA                                        | pre-miRNAs amplification |
| U6_Rv                 | 60 | AACGCTTCACGAATTTGCCG                                     | pre-miRNAs amplification |
| pre-miR-181a-1/a-2_Fw | 60 | GAACATTCAACGCTGTCGGTG                                    | pre-miRNAs amplification |
| pre-miR-181a-2_Rv     | 60 | TCAACGGCCGATGGTTTACA                                     | pre-miRNAs amplification |
| pre-miR-181a-1-4L_Rv  | 60 | GATCGATGGTTTGCCTTCAGA                                    | pre-miRNAs amplification |
| pre-miR-181a-1_4S_Rv  | 60 | ACGATCGATGGTTTGCCTTTAG                                   | pre-miRNAs amplification |
| pre-miR-182_Fw        | 60 | TGGCAATGGTAGAACTCACAC                                    | pre-miRNAs amplification |
| pre-miR-182_Rv        | 60 | GCAAGTCTAGAACCACCGGAT                                    | pre-miRNAs amplification |
| pre-miR-181a-1_T7_Fw  | 12 | TAATACGACTCACTATAGAACATTTCAACGCTGTCGGTGAGTTGGTATCTAAAGGC | in vitro synthesis       |
| pre-miR-181a-1_Rv     | 12 | TGTACAGTCAACGATCGATGGTTTGCCTTTAGATACCAAACCTCACCG         | in vitro synthesis       |

CLONING (wild type and mutated fragments of TUBB3, APP, THBS1 3'UTR)

| Oligo Name    | Ta | Sequence (5'→3')                                               | 3'UTR PCR amplification of |
|---------------|----|----------------------------------------------------------------|----------------------------|
| APP_Fw        | 66 | GTACAAGTAATCTAGACCCCGGGAGCCTCTCGAATC                           | WT                         |
| APP_Rv        | 66 | CATGTCTGGATCTACGTAATTTTCAACAGCTGGGCAC                          | WT                         |
| TUBB3_Fw      | 68 | GTACAAGTAATCTAGAAGGAACCCACTGCAAAGCCAGAG                        | WT                         |
| TUBB3_Rv      | 68 | GTATCTTATCATGTCTGGATCTACGTAATAAATACAGTACTCTGCATCTGAACCTGTGC    | WT                         |
| THBS1_Fw      | 55 | CGGCATGGACGAGCTGTACAAGTAATCTAGATCCAGAAGTTCTTATTCCATG           | WT                         |
| THBS1_Rv      | 55 | GTATCTTATCATGTCTGGATCTACGTAATTTTAAATAGTTTATTTTTTATATTTTAC      | WT                         |
| APP_Fw        | 68 | GTACAAGTAATCTAGACCCCGGGAGCCTCTCGAATC                           | MUT frg1                   |
| APP_1mut_Rv   | 68 | CTTTACAGTACACAAAACCTCTATTGATAATGTCGTGGAAAGAGGAAATGTTAAGAG      | MUT frg1                   |
| APP_2mut_Fw   | 66 | CCACGACATTAATCAATAGGAGTTTTTGTGTACTGTAAGAGTTAGCTGTCTTAACTACTTGC | MUT frg2                   |
| APP_Rv        | 66 | CATGTCTGGATCTACGTAATTTTCAACAGCTGGGCAC                          | MUT frg2                   |
| TUBB3_Fw      | 67 | GTACAAGTAATCTAGAAGGAACCCACTGCAAAGCCAGAG                        | MUT frg1                   |
| TUBB3_1mut_Rv | 67 | GCCTCACTCCTACATGTTGAACAGCAGGAAGTTTATTTTAAAAATAAATAATCCAG       | MUT frg1                   |
| TUBB3_2mut_Fw | 63 | TAACTTCTGCTGTTCAACATGTAGGAGTGGGCTTTTTCTAATTATGGAACAGGC         | MUT frg2                   |
| TUBB3_2mut_Rv | 63 | GGATTATATTTATGTACGTGTCTATATCAACACAGACTCAAACCTCTATATATGC        | MUT frg2                   |
| TUBB3_3mut_Fw | 67 | GAGTCTGTGTTGATATAGACACGTACATAAATAATCCTTTATCTATTACGCTATCAACTTTG | MUT frg3                   |
| TUBB3_Rv      | 67 | GTATCTTATCATGTCTGGATCTACGTAATAAATACAGTACTCTGCATCTGAACCTGTGC    | MUT frg3                   |
| THBS1_Fw      | 64 | CGGCATGGACGAGCTGTACAAGTAATCTAGATCCAGAAGTTCTTATTCCATG           | MUT frg1                   |
| THBS1_1mut_Rv | 64 | GCTACATCTACAGCCTACCCTCTTAGTACTCTGGAGATTCAGGTCCTCTC             | MUT frg1                   |
| THBS1_2mut_Fw | 63 | GAATCTCCAGAGTACTAAGGAGTGGAGGCTGTAGATGTAGCTCCCGCTG              | MUT frg2                   |
| THBS1_2mut_Rv | 63 | CACACACACACACACGTCGCCGTCTAATACTCTTTTAAAGGAGTAATATATAAACCAC     | MUT frg2                   |
| THBS1_3mut_Fw | 56 | CTTTAAAGAGTATTAGACACGGCACGTGTGTGTGTGTGTTTGGCGTGGGGAGAGAGAG     | MUT frg3                   |
| THBS1_Rv      | 56 | GTATCTTATCATGTCTGGATCTACGTAATTTTAAATAGTTTATTTTTTATATTTTAC      | MUT frg3                   |
| THBS1_Q5_Fw   | 60 | ATTCATAGACACTAAGAGGATGTGATCGCAC                                | MUT Q5                     |
| THBS1_Q5_Rv   | 60 | GAAGAACTTCTGGATCTAGATTACTGTACAGCTC                             | MUT Q5                     |

LIST OF MORPHOLINOS (MOs)

| Name                     | Vendor     | Sequence (5'-3') all 3' Fluorescein | Used                                        |
|--------------------------|------------|-------------------------------------|---------------------------------------------|
| MO-5p #1                 | Gene tools | AGATACCAAACCTACCGACAGCGTT           | in MOs-5p and MO-181- family cocktail       |
| MO-5p #2                 | Gene tools | CTTTCTAAAACCTACCGACAGCGTT           | in MOs-5p and MO-181- family cocktail       |
| MO-3p #1                 | Gene tools | GATCGATGGTTTGCCTTTAGATAC            | in MOs-3p cocktail                          |
| MO-3p #2                 | Gene tools | GGCCGATGGTTTATATTTTATACT            | in MOs-3p cocktail                          |
| Pri-miR-MO               | Gene tools | ATTGCCGTAATGTACAGTCAACGAT           | for blocking pre-miR-181a-1 Drosha cleavage |
| Standard control (co-MO) | Gene tools | CCTCTTACCTCAGTTACAATTTTATA          | as control MO 25 nt                         |
| miR-181b-MO              | Gene tools | CCACCCGACAGCAATGAATGTT              | in MO-181- family cocktail                  |
| Custom control (co-MO)   | Gene tools | GTGTAACACGTCTATACGCCCA              | as control MO 22 nt                         |
